# Supplementary material
Source: ML conference proceedings conference paper supplement (https://openreview.net/forum?id=GSpQIJ0NQA)
Supplement: supplementary_material [file attachment]

---

# Supplementary Material: SADGA: Structure-Aware Dual Graph Aggregation Network for Text-to-SQL

---

Ruichu Cai<sup>1,2</sup>, Jinjie Yuan<sup>1</sup>, Boyan Xu<sup>1\*</sup>, Zhifeng Hao<sup>1,3</sup>

<sup>1</sup> School of Computer Science, Guangdong University of Technology, Guangzhou, China

<sup>2</sup> Pazhou lab, Guangzhou, China

<sup>3</sup> College of Science, Shantou University, Shantou, China

cairuichu@gdut.edu.cn, yuanjinjie0320@gmail.com

hpakyim@gmail.com, zfhao@gdut.edu.cn

## A Preliminaries

Gated Graph Neural Networks [3] and Relation-Aware Transformer [7] are two critical components of our proposed model. The preliminaries of these two components are introduced as follows.

### A.1 Gated Graph Neural Network

Gated Graph Neural Networks (GGNNs) have been proposed by Li et al. [3], which adopt the Gated Recurrent Unit (GRU) [1] layer to encode the node in graph neural networks. Given a graph  $G = (V, E, T)$  including nodes  $v_i \in V$  and directed label edges  $(v_s, t, v_d) \in E$  where  $v_s$  denotes the source node,  $v_d$  denotes the destination node, and  $t \in T$  denotes the edge type. The  $i$ -th node updated embedding at step  $l$  is denoted as  $\mathbf{h}_i^{(l)}$ . The update process is as follows: firstly, each node first aggregates its neighbor information as:

$$\mathbf{f}_i^{(l)} = \sum_{t \in T} \sum_{(i,k) \in E_t} (\mathbf{W}_t \mathbf{h}_k^{(l-1)} + \mathbf{b}_t), \quad (1)$$

where  $\mathbf{h}_k^{(l-1)}$  is the neighboring representation. The trainable parameter  $\mathbf{W}_t$  and  $\mathbf{b}_t$  vary according to the edge type  $t$ . Then, the node updates its representation using the vanilla GRU:

$$\mathbf{h}_i^{(l)} = \text{GRU}(\mathbf{h}_i^{(l-1)}, \mathbf{f}_i^{(l)}), \quad (2)$$

where  $\mathbf{h}_i^{(l)}$  is the updated node representation at step  $l$ .

### A.2 Relation-Aware Transformer

Relation-Aware Transformer (RAT) [7] is an extension of Transformer [6], which introduces prior relation knowledge to the self-attention mechanism. Given a set of inputs  $X = \{\mathbf{x}_i\}_{i=1}^n$  where  $\mathbf{x}_i \in \mathbb{R}^d$  and  $\mathbf{r}_{ij}$  denotes the relation representation between  $\mathbf{x}_i$  and  $\mathbf{x}_j$  in  $X$ . The relation-aware self-attention layer can output the updated representation  $\mathbf{z}_i$  for  $\mathbf{x}_i$ , formulated as

$$e_{i,j}^{(h)} = \frac{\mathbf{x}_i \mathbf{W}_Q^{(h)} (\mathbf{x}_j \mathbf{W}_K^{(h)} + \mathbf{r}_{ij}^K)^T}{\sqrt{d_z/H}}, \alpha_{i,j}^{(h)} = \text{softmax}_j \{e_{i,j}^{(h)}\}, \quad (3)$$

$$\mathbf{z}_i^{(h)} = \sum_{j=1}^n \alpha_{i,j}^{(h)} (\mathbf{x}_j \mathbf{W}_V^{(h)} + \mathbf{r}_{ij}^V), \quad (4)$$

---

\*Corresponding author

where  $h$  is the multi-head attention index,  $H$  is the number of heads, and  $\mathbf{W}_Q^{(h)}, \mathbf{W}_K^{(h)}, \mathbf{W}_V^{(h)} \in \mathbb{R}^{d \times (d/H)}$  are trainable parameters. Here  $\alpha_{i,j}^{(h)}$  means that the attention score between  $\mathbf{x}_i$  and  $\mathbf{x}_j$  of head  $h$ .

## B Relations of Dual-Graph Construction

All predefined relations used in the construction of the dual-graph and the cross-graph relations are summarized in Table 1.

Table 1: The predefined relations for Dual-Graph Construction.

|                                    | Node A | Node B | Predefined Relation                                                  |
|------------------------------------|--------|--------|----------------------------------------------------------------------|
| <b>Question-Graph Construction</b> | Word   | Word   | 1-order Word Distance<br>2-order Word Distance<br>Dependency Parsing |
|                                    | Column | Column | Same Table Match<br>Primary-Foreign Key                              |
| <b>Schema-Graph Construction</b>   | Column | Table  | Foreign Key<br>Primary Key<br>Table-Column Match                     |
|                                    | Table  | Table  | Primary-Foreign Key                                                  |
|                                    | Word   | Table  | Exact String Match<br>Partial String Match                           |
| <b>Cross-Graph</b>                 | Word   | Column | Exact String Match<br>Partial String Match<br>Value Match            |

**1-order Word Distance** Word A and word B are adjacent to each other in the question.

**2-order Word Distance** Word A and word B are spaced one word apart in the question.

**Dependency Parsing** The specific grammatical relation between word A and word B generated by the Stanford CoreNLP toolkit [4].

**Same Table Match** Both column A and column B belong to the same table.

**Primary-Foreign Key (Column-Column)** Column A is a foreign key for a primary key column B of another table.

**Foreign Key** Column A is a foreign key of table B.

**Primary Key** Column A is a primary key of table B.

**Table-Column Match** Column A belongs to table B.

**Primary-Foreign Key (Table-Table)** Table A has a foreign key column for a primary key column of table B.

**Exact String Match (Word-Table)** Word A is part of table B, and the question contains the name of table B.

**Partial String Match (Word-Table)** Word A is part of table B, and the question does not contain the name of table B.

**Exact String Match (Word-Column)** Word A is part of column B, and the question contains the name of column B.

**Partial String Match (Word-Column)** Word A is part of column B, and the question does not contain the name of column B.

**Value Match** Word A is part of the cell values of column B.

## C Decoder Details

The decoder in our model aims to output a sequence of rules (actions) that generates the corresponding SQL syntax abstract tree (AST) [8]. Given the final representations  $\mathbf{h}^q$ ,  $\mathbf{h}^t$  and  $\mathbf{h}^c$ , of the question words, tables and columns respectively from the encoder. Let  $\mathbf{h} = [\mathbf{h}^q; \mathbf{h}^t; \mathbf{h}^c]$ . Formally,

$$\Pr(P | \mathbf{h}) = \prod_t \Pr(\text{Rule}_t | \text{Rule}_{<t}, \mathbf{h}), \quad (5)$$

where  $\text{Rule}_{<t}$  are all the previous rules. We apply a LSTM [2] to generate the rule sequence. The LSTM hidden state  $\mathbf{H}_t$  and the cell state  $\mathbf{C}_t$  at step  $t$  are updated as:

$$\mathbf{H}_t, \mathbf{C}_t = \text{LSTM}(\mathbf{I}_t, \mathbf{H}_{t-1}, \mathbf{C}_{t-1}). \quad (6)$$

Similar to Wang et al. [7], the LSTM input  $\mathbf{I}_t$  is constructed by:

$$\mathbf{I}_t = [\mathbf{r}_{t-1}; \mathbf{z}_t; \mathbf{e}_t; \mathbf{r}_{pt}; \mathbf{H}_{pt}], \quad (7)$$

where  $\mathbf{r}_{t-1}$  is the representation of the previous rule,  $\mathbf{z}_t$  is the context vector calculated using the attention on  $\mathbf{H}_{t-1}$  over  $\mathbf{h}$ , and  $\mathbf{e}_t$  is the learned representation of the current node type. In addition,  $pt$  is the step corresponding to generating the parent node in the AST of the current node.

With the LSTM output  $\mathbf{H}_t$ , all rule scores at step  $t$  are calculated. The candidate rules are either schema-independent, e.g., the grammar rule, or schema-specific, e.g., the table/column. For the schema-independent rule  $u$ , we compute its score as:

$$\Pr(\text{Rule}_t = u | \text{Rule}_{<t}, \mathbf{h}) = \text{softmax}_u(L(\mathbf{H}_t)), \quad (8)$$

where  $L$  is a 2-layer MLP with the *tanh* activation. To select the table/column rule, we first build the alignment matrices  $\mathbf{M}^T$ ,  $\mathbf{M}^C$  between entities (question word, table, column) and tables, columns respectively with the relation-aware attention as a pointer mechanism:

$$\overline{\mathbf{M}}_{i,j}^T = \mathbf{h}_i \mathbf{W}_Q^t (\mathbf{h}_j^t \mathbf{W}_K^t + \mathbf{R}_{ij}^E)^T, \mathbf{M}_{i,j}^T = \text{softmax}_j \left\{ \overline{\mathbf{M}}_{i,j}^T \right\}, \quad (9)$$

$$\overline{\mathbf{M}}_{i,j}^C = \mathbf{h}_i \mathbf{W}_Q^c (\mathbf{h}_j^c \mathbf{W}_K^c + \mathbf{R}_{ij}^E)^T, \mathbf{M}_{i,j}^C = \text{softmax}_j \left\{ \overline{\mathbf{M}}_{i,j}^C \right\}, \quad (10)$$

where  $\mathbf{M}^T \in R^{(|q|+|t|+|c|) \times |t|}$ ,  $\mathbf{M}^C \in R^{(|q|+|t|+|c|) \times |c|}$ . Then, we calculate the score of the  $j$ -th column/table:

$$\overline{\alpha}_i = \mathbf{H}_t \mathbf{W}_Q (\mathbf{h}_i \mathbf{W}_K)^T, \alpha_i = \text{softmax}_i \{ \overline{\alpha}_i \}, \quad (11)$$

$$\Pr(\text{Rule}_t = \text{Table}[j] | \text{Rule}_{<t}, \mathbf{h}) = \sum_{i=1}^{|q|+|t|+|c|} \alpha_i \mathbf{M}_{i,j}^T, \quad (12)$$

$$\Pr(\text{Rule}_t = \text{Column}[j] | \text{Rule}_{<t}, \mathbf{h}) = \sum_{i=1}^{|q|+|t|+|c|} \alpha_i \mathbf{M}_{i,j}^C. \quad (13)$$

## D Hyperparameters

The hyperparameters of our model under different pre-trained models are listed in Table 2.

## E Fine-grained Ablation Studies

Due to page limitations, we cannot further discuss the fine-grained ablation studies in the main paper. Therefore, the fine-grained ablation studies are discussed in this section. Firstly, all the ablation variants are presented in detail as follows:

**w/o Local Graph Linking** Discard the *Local Graph Linking* phase (Eq. 6 ~9), i.e.,  $\mathbf{h}_{i,j}^k$  in Eq. 10 is replaced by  $\mathbf{h}_j^k$ . There is no structure-aware ability during the dual graph aggregation.

**w/o Structure-Aware Aggregation** Remove the entire Structure-Aware Aggregation module in SADGA to examine the effectiveness of our designed graph aggregation method.

Table 2: Hyperparameters for GloVe, BERT-base, BERT-large and GAP setting.

| Hyper-paramter          | GloVe             | BERT-base         | BERT-large        | GAP               |
|-------------------------|-------------------|-------------------|-------------------|-------------------|
| Size                    | 300               | 768               | 1024              | 1024              |
| Batch size              | 20                | 24                | 24                | 24                |
| Max step                | 40k               | 90k               | 81k               | 61k               |
| Learning rate           | 7.44e-4           | 3.44e-4           | 2.44e-4           | 1e-4              |
| Learning rate scheduler | Warmup polynomial | Warmup polynomial | Warmup polynomial | Warmup polynomial |
| Warmup steps            | 2k                | 10k               | 10k               | 5k                |
| Bert learning rate      | -                 | 3e-6              | 3e-6              | 1e-5              |
| Clip gradient           | -                 | 2                 | 1                 | 1                 |
| Number of SADGA layers  | 3                 | 3                 | 3                 | 3                 |
| Number of RAT layers    | 4                 | 4                 | 4                 | 4                 |
| RAT heads               | 8                 | 8                 | 8                 | 8                 |
| Number of GGNN layers   | 2                 | 2                 | 2                 | 2                 |
| SADGA dropout           | 0.5               | 0.5               | 0.5               | 0.5               |
| RAT dropout             | 0.1               | 0.1               | 0.1               | 0.1               |
| Encoder hidden dim      | 256               | 768               | 1024              | 1024              |
| Decoder LSTM size       | 512               | 512               | 512               | 512               |
| Decoder dropout         | 0.21              | 0.21              | 0.21              | 0.21              |

**w/o GraphAggr( $\mathcal{G}_S, \mathcal{G}_Q$ )** Remove the aggregation process from the question-graph  $\mathcal{G}_Q$  to the schema-graph  $\mathcal{G}_S$  in Structure-Aware Aggregation, signifying that the nodes in the schema-graph could not obtain the structure-aware information from the question-graph.

**w/o GraphAggr( $\mathcal{G}_Q, \mathcal{G}_S$ )** Similar to w/o GraphAggr( $\mathcal{G}_S, \mathcal{G}_Q$ ).

**Cross-Graph Linking in Dual-Graph Encoding** Build the linking between the question and schema in Dual-Graph Encoding via GGNN (Section 3.2) rather than Structure-Aware Aggregation. It may be unfair to wholly remove the whole aggregation module to compare with the main model, resulting in no question-schema linking in SADGA. Therefore, we also experiment as follows: after the well-constructed dual graph, the nodes in the question-graph and the schema-graph are linked with the predefined cross-graph relations, i.e., the question-graph and schema-graph are connected into one graph in Dual-Graph Encoding without our graph aggregation method.

**w/o Relation Node (replace with edge types)** Remove the relation node in Dual-Graph Encoding. Regarding how to use the information of the prior relationship in the question-graph and schema-graph, we represent the predefined relations with the edge types, introducing more trainable parameters.

**w/o Global Pooling (Eq. 3 and Eq. 4)** Remove the global pooling step during the Structure-Aware Aggregation, i.e., Eq. 3 and Eq. 4, to examine whether the global information of the query-graph is helpful for graph aggregation.

**w/o Aggregation Gate (Eq. 8)** Discard the gate mechanism between the global information and the local information in *Dual-Graph Aggregation Mechanism*. Instead of the gating mechanism, we average the weight of the global information and the local information, i.e.,  $\text{gate}_{i,j} = 0.5$  in Eq. 8.

**w/o Relation Feature in Aggregation ( $R_{ij}^E$ )** Remove the cross-graph relation bias between the question word and table/column in the attention step of Structure-Aware Aggregation. This model variant does not utilize any predefined cross-graph relations.

As shown in Table 3 (Table 3 of the main paper), all the components are necessary to SADGA. When compared to **w/o Structure-Aware Aggregation**, SADGA gets worse results when it retains one-way aggregation, i.e., **w/o GraphAggr( $\mathcal{G}_S, \mathcal{G}_Q$ )** and **w/o GraphAggr( $\mathcal{G}_Q, \mathcal{G}_S$ )**. We guess that it is because of the imbalance of the embedding update of the dual graph. The downgraded performance of **w/o Relation Node** is due to the increase of relational edge type, which leads to the over increase of the training parameters. The downgraded performance of **w/o Aggregation Gate** indicates the advantages of the gated-based aggregation mechanism, which provides the flexibility to

Table 3: Accuracy of ablation studies on Spider development set by hardness levels.

| Model                                                    | Easy        | Medium      | Hard        | Extra Hard  | All         |
|----------------------------------------------------------|-------------|-------------|-------------|-------------|-------------|
| <b>SADGA</b>                                             | <b>82.3</b> | <b>67.3</b> | <b>54.0</b> | <b>42.8</b> | <b>64.7</b> |
| w/o Local Graph Linking                                  | 83.5(+1.2)  | 64.8(-2.5)  | 53.4(-0.6)  | 38.6(-4.2)  | 63.2(-1.5)  |
| w/o Structure-Aware Aggregation                          | 83.5(+1.2)  | 62.1(-5.2)  | 55.2(+1.2)  | 42.2(-0.6)  | 62.9(-1.8)  |
| w/o GraphAggr( $\mathcal{G}_S, \mathcal{G}_Q$ )          | 83.1(+0.8)  | 64.1(-3.2)  | 52.3(-1.7)  | 40.4(-2.4)  | 62.9(-1.8)  |
| w/o GraphAggr( $\mathcal{G}_Q, \mathcal{G}_S$ )          | 79.0(-3.3)  | 63.7(-3.6)  | 50.0(-4.0)  | 41.6(-1.2)  | 61.5(-3.2)  |
| Cross-Graph Linking in Dual-Graph Encoding               | 82.3(-0)    | 63.7(-3.6)  | 51.1(-2.9)  | 45.2(+2.4)  | 63.1(-1.6)  |
| w/o Relation Node (replace with edge types)              | 79.4(-2.9)  | 63.5(-3.8)  | 54.6(+0.6)  | 40.4(-2.4)  | 62.1(-2.6)  |
| w/o Global Pooling (Eq. 3 and Eq. 4)                     | 82.7(+0.4)  | 64.3(-3.0)  | 54.0(-0)    | 41.6(-1.2)  | 63.5(-1.2)  |
| w/o Aggregation Gate (Eq. 8, $\text{gate}_{i,j} = 0.5$ ) | 81.9(-0.4)  | 60.1(-7.2)  | 54.6(+0.6)  | 40.4(-2.4)  | 61.2(-3.5)  |
| w/o Relation Feature in Aggregation ( $R_{ij}^E$ )       | 79.4(-2.9)  | 64.3(-3.0)  | 54.6(+0.6)  | 41.6(-1.2)  | 62.7(-2.0)  |
| <b>SADGA + BERT-base</b>                                 | <b>85.9</b> | <b>71.7</b> | <b>58.0</b> | <b>47.6</b> | <b>69.0</b> |
| w/o Local Graph Linking                                  | 85.5(-0.4)  | 69.5(-2.2)  | 54.0(-4.0)  | 42.8(-4.8)  | 66.4(-2.6)  |
| w/o Structure-Aware Aggregation                          | 85.9(-0)    | 68.8(-2.9)  | 57.5(-0.5)  | 41.0(-6.6)  | 66.5(-2.5)  |

filter out useless local information. The downgraded performance of **w/o Global Pooling** indicates that the global information of question-graph or schema-graph is beneficial to another graph. Our **SADGA w/o Relation Feature in Aggregation** is comparable with RATSQ [7] (62.7%), which shows that the structure-aware aggregation method can obtain RATSQ results without relying on predefined question-schema relations at all.

## F Case Study Against Baseline

In Figure 1, We show some cases generated by our SADGA and RATSQ [7] from the **Hard** or **Extra Hard** level samples of Spider Dataset [9]. Both SADGA and RATSQ are trained under the pre-trained model GAP [5]. In Case 1 and Case 2, RATSQ misaligned the word “museum” and “rank”, resulting in the incorrect selection of tables and columns in the generated query. RATSQ utilizes the predefined relationship based on a string matching strategy to cause the above misalignment problem. Our SADGA is able to link the question words and tables/columns correctly in the hard cases of multiple entities, which is beneficial from the local structural information introduced by the proposed structure-aware aggregation method. In Cases 3~6, RATSQ generates semantically wrong query statements, especially when the target is a complex query, such as a nested query. Compared with RATSQ, SADGA adopts a unified dual-graph modeling method to consider both the global and local structure of the question and schema, which is more efficient for capturing the complex semantics of questions and building more exactly linkings in hard cases.

## References

- [1] Kyunghyun Cho, Bart van Merriënboer, Caglar Gulcehre, Dzmitry Bahdanau, Fethi Bougares, Holger Schwenk, and Yoshua Bengio. Learning phrase representations using RNN encoder-decoder for statistical machine translation. In *Proceedings of the 2014 Conference on Empirical Methods in Natural Language Processing (EMNLP)*, pages 1724–1734, Doha, Qatar, 2014. Association for Computational Linguistics.
- [2] Sepp Hochreiter and Jürgen Schmidhuber. Long short-term memory. *Neural computation*, pages 1735–1780, 1997.
- [3] Yujia Li, Daniel Tarlow, Marc Brockschmidt, and Richard S. Zemel. Gated graph sequence neural networks. In Yoshua Bengio and Yann LeCun, editors, *4th International Conference on Learning Representations, ICLR 2016, San Juan, Puerto Rico, May 2-4, 2016, Conference Track Proceedings*, 2016.
- [4] Christopher Manning, Mihai Surdeanu, John Bauer, Jenny Finkel, Steven Bethard, and David McClosky. The Stanford CoreNLP natural language processing toolkit. In *Proceedings of 52nd Annual Meeting of the Association for Computational Linguistics: System Demonstrations*, pages 55–60, Baltimore, Maryland, 2014. Association for Computational Linguistics.

- [5] Peng Shi, Patrick Ng, Zhiguo Wang, Henghui Zhu, Alexander Hanbo Li, Jun Wang, Cicero Nogueira dos Santos, and Bing Xiang. Learning contextual representations for semantic parsing with generation-augmented pre-training. In *Proceedings of the AAAI Conference on Artificial Intelligence*, pages 13806–13814, 2021.
- [6] Ashish Vaswani, Noam Shazeer, Niki Parmar, Jakob Uszkoreit, Llion Jones, Aidan N. Gomez, Lukasz Kaiser, and Illia Polosukhin. Attention is all you need. In Isabelle Guyon, Ulrike von Luxburg, Samy Bengio, Hanna M. Wallach, Rob Fergus, S. V. N. Vishwanathan, and Roman Garnett, editors, *Advances in Neural Information Processing Systems 30: Annual Conference on Neural Information Processing Systems 2017, December 4-9, 2017, Long Beach, CA, USA*, pages 5998–6008, 2017.
- [7] Bailin Wang, Richard Shin, Xiaodong Liu, Oleksandr Polozov, and Matthew Richardson. RAT-SQL: Relation-aware schema encoding and linking for text-to-SQL parsers. In *Proceedings of the 58th Annual Meeting of the Association for Computational Linguistics*, pages 7567–7578, Online, 2020. Association for Computational Linguistics.
- [8] Pengcheng Yin and Graham Neubig. A syntactic neural model for general-purpose code generation. In *Proceedings of the 55th Annual Meeting of the Association for Computational Linguistics (Volume 1: Long Papers)*, pages 440–450, Vancouver, Canada, 2017. Association for Computational Linguistics.
- [9] Tao Yu, Rui Zhang, Kai Yang, Michihiro Yasunaga, Dongxu Wang, Zifan Li, James Ma, Irene Li, Qingning Yao, Shanelle Roman, Zilin Zhang, and Dragomir Radev. Spider: A large-scale human-labeled dataset for complex and cross-domain semantic parsing and text-to-SQL task. In *Proceedings of the 2018 Conference on Empirical Methods in Natural Language Processing*, pages 3911–3921, Brussels, Belgium, 2018. Association for Computational Linguistics.

- (1) **Question:** What are the id, name and membership level of visitors who have spent the largest amount of money in total in all museum tickets?
- Gold SQL:** `SELECT T2.visitor_id, T1.name, T1.level_of_membership FROM Visitor AS T1 JOIN Visit AS T2 ON T1.id = T2.visitor_id GROUP BY T2.visitor_id ORDER BY Sum(T2.total_spent) DESC LIMIT 1.`
- RATSQL Result:** `SELECT Museum.museum_id, Museum.name, Visitor.level_of_membership FROM Museum JOIN Visit JOIN Visitor GROUP BY Museum.museum_id ORDER BY Sum(Visit.total_spent) Desc LIMIT 1.` ✘
- SADGA Result:** `SELECT Visitor.id, Visitor.name, Visitor.level_of_membership FROM Visit JOIN Visitor ON Visit.visitor_id = Visitor.id GROUP BY Visitor.id ORDER BY Sum(Visit.total_spent) Desc LIMIT 1.` ✔
- (2) **Question:** Find the first name, country code and birth date of the winner who has the highest rank points in all matches.
- Gold SQL:** `SELECT T1.first_name, T1.country_code, T1.birth_date FROM Players AS T1 JOIN matches AS T2 ON T1.player_id = T2.winner_id ORDER BY T2.winner_rank_points DESC LIMIT 1`
- RATSQL Result:** `SELECT Players.first_name, Players.country_code, Players.birth_date FROM Players JOIN Rankings ON Players.player_id = Rankings.player_id ORDER BY Rankings.ranking_points Desc LIMIT 1.` ✘
- SADGA Result:** `SELECT Players.first_name, Players.country_code, Players.birth_date FROM Players JOIN Matches ON Players.player_id = Matches.winner_id ORDER BY Matches.winner_rank_points Desc LIMIT 1.` ✔
- (3) **Question:** Find all airlines that have flights from both airports 'APG' and 'CVO'.
- Gold SQL:** `SELECT T1.airline FROM Airlines AS T1 JOIN Flights AS T2 ON T1.id = T2.airline WHERE T2.source_airport = "APG" INTERSECT SELECT T1.airline FROM Airlines AS T1 JOIN Flights AS T2 ON T1.id = T2.airline WHERE T2.source_airport = "CVO".`
- RATSQL Result:** `SELECT Airlines.airline FROM Flights WHERE Flights.source_airport = 'VALUE' INTERSECT SELECT Airlines.airline FROM Flights WHERE Flights.source_airport = 'VALUE'.` ✘
- SADGA Result:** `SELECT Airlines.airline FROM Airlines JOIN Flights ON Airlines.id = Flights.airline WHERE Flights.source_airport = 'VALUE' INTERSECT SELECT Airlines.airline FROM Airlines JOIN Flights ON Airlines.id = Flights.airline WHERE Flights.source_airport = 'VALUE'.` ✔
- (4) **Question:** What are the names of all stadiums that did not have a concert in 2014 ?
- Gold SQL:** `SELECT name FROM Stadium EXCEPT SELECT T2.name FROM Concert AS T1 JOIN Stadium AS T2 ON T1.stadium_id = T2.stadium_id WHERE T1.year = 2014.`
- RATSQL Result:** `SELECT Stadium.name FROM Stadium WHERE Stadium.stadium_id NOT IN (SELECT Concert.stadium_id FROM Concert WHERE Concert.year = 'VALUE').` ✘
- SADGA Result:** `SELECT Stadium.name FROM Stadium EXCEPT SELECT Stadium.name FROM Stadium JOIN Concert ON Stadium.stadium_id = Concert.stadium_id WHERE Concert.year = 'VALUE'.` ✔
- (5) **Question:** Show name of all students who have some friends and also are liked by someone else.
- Gold SQL:** `SELECT T2.name FROM Friend AS T1 JOIN Highschooler AS T2 ON T1.student_id = T2.id INTERSECT SELECT T2.name FROM Likes AS T1 JOIN Highschooler AS T2 ON T1.liked_id = T2.id.`
- RATSQL Result:** `SELECT Highschooler.name FROM Highschooler WHERE Friend.friend_id IN (SELECT Likes.student_id FROM Likes).` ✘
- SADGA Result:** `SELECT Highschooler.name FROM Highschooler JOIN Friend ON Friend.student_id = Highschooler.id INTERSECT SELECT Highschooler.name FROM Highschooler JOIN Likes ON Highschooler.id = Likes.liked_id.` ✔
- (6) **Question:** What is the name of the semester with no students enrolled?
- Gold SQL:** `SELECT semester_name FROM Semesters WHERE semester_id NOT IN (SELECT semester_id FROM Student_Enrolment).`
- RATSQL Result:** `SELECT Semesters.semester_name FROM Semesters EXCEPT SELECT Semesters.semester_name FROM Semesters JOIN Student_Enrolment ON Semesters.semester_id = Student_Enrolment.semester_id.` ✘
- SADGA Result:** `SELECT Semesters.semester_name FROM Semesters WHERE Semesters.semester_id NOT IN (SELECT Student_Enrolment.semester_id FROM Student_Enrolment).` ✔

Figure 1: More cases at the **Hard** or **Extra Hard** level in different database schemas. (RATSQL + GAP vs. SADGA + GAP)
